# Supplementary material
Source: PubMed Central journal article supplement (PMC4582009)
Supplement: NIHMS720817-supplement.pdf [file NIHMS720817-supplement.pdf]

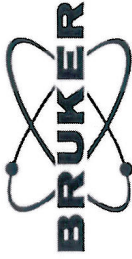

0.00  
0.03  
0.04  
0.06  
0.07  
0.08  
0.09  
0.10  
0.11  
0.12  
0.13  
0.14  
0.15  
0.16  
0.17  
0.18  
0.19  
0.20  
0.21  
0.22  
0.23  
0.24  
0.25  
0.26  
0.27  
0.28  
0.29  
0.30  
0.31  
0.32  
0.33  
0.34  
0.35  
0.36  
0.37  
0.38  
0.39  
0.40  
0.41  
0.42  
0.43  
0.44  
0.45  
0.46  
0.47  
0.48  
0.49  
0.50  
0.51  
0.52  
0.53  
0.54  
0.55  
0.56  
0.57  
0.58  
0.59  
0.60  
0.61  
0.62  
0.63  
0.64  
0.65  
0.66  
0.67  
0.68  
0.69  
0.70  
0.71  
0.72  
0.73  
0.74  
0.75  
0.76  
0.77  
0.78  
0.79  
0.80  
0.81  
0.82  
0.83  
0.84  
0.85  
0.86  
0.87  
0.88  
0.89  
0.90  
0.91  
0.92  
0.93  
0.94  
0.95  
0.96  
0.97  
0.98  
0.99  
1.00

Current Data Parameters  
NAME 12038-126-2  
EXPNO 10  
PROCNO 1

F2 - Acquisition Parameters  
Date\_ 20120814  
Time 15.47  
INSTRUM spect  
PROBHD 5 mm QNP 1H/1  
PULPROG zg  
TD 32768  
SOLVENT CDCl3  
NS 16  
DS 2  
SWH 6172.839 Hz  
FIDRES 0.188380 Hz  
AQ 2.6542580 sec  
RG 256  
DW 81.000 usec  
DE 6.00 usec  
TE 300.0 K  
D1 1.00000000 sec  
TD0 1

===== CHANNEL f1 =====  
NUC1 1H  
P1 7.60 usec  
PL1 -6.00 dB  
SFO1 300.1318534 MHz

F2 - Processing parameters  
SI 32768  
SF 300.1299875 MHz  
WDW EM  
SSB 0  
LB 0.30 Hz  
GB 0  
PC 1.00

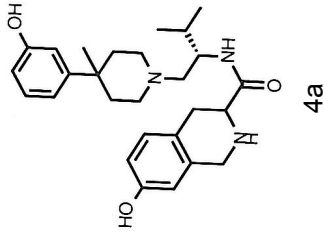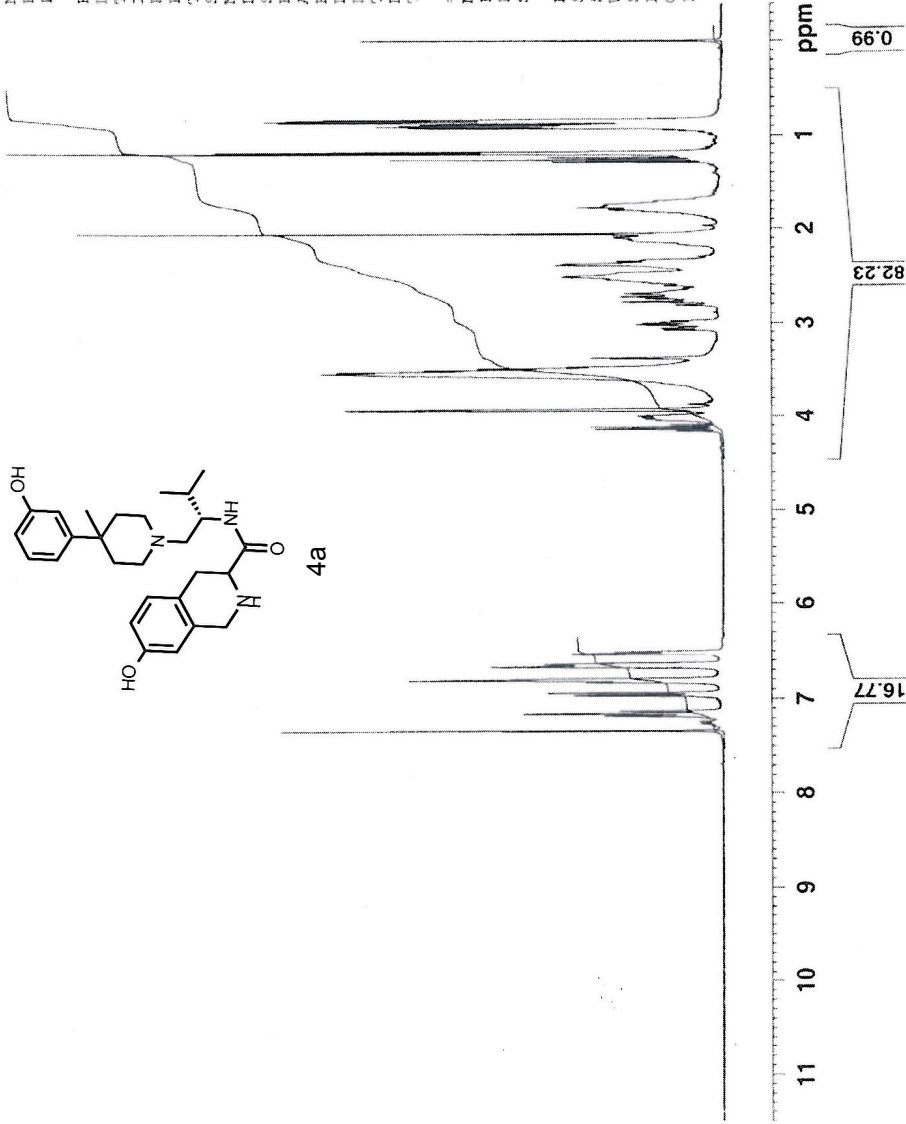

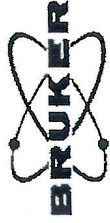

0.00  
0.86  
0.89  
0.91  
1.19  
1.20  
1.23  
1.26  
1.28  
1.38  
1.79  
1.81  
1.83  
1.85  
2.04  
2.07  
2.27  
2.28  
2.32  
2.34  
2.37  
2.57  
2.61  
2.88  
2.88  
2.88  
3.22  
3.23  
3.26  
3.55  
3.69  
4.08  
4.11  
4.13  
4.18  
6.41  
6.42  
6.53  
6.54  
6.56  
6.57  
6.85  
6.86  
6.87  
6.89  
6.90  
6.97  
7.00  
7.05  
7.07  
7.08  
7.10  
7.25  
7.26  
7.27  
7.28

Current Data Parameters  
 NAME 12110-069 2  
 EXEMG 70  
 PROCNO 1

F2 - Acquisition Parameters  
 Date\_ 20131210  
 Time 16.27  
 INSTRUM spect  
 PROBRD 5 mm QNP 1H/1  
 PULPROG zg30  
 TD 65536  
 SOLVENT CDCl3  
 NS 15  
 DS 2  
 SWH 6172.839 Hz  
 FIDRES 0.094190 Hz  
 AQ 5.3084660 s  
 RG 57  
 DW 81.000 us  
 DE 6.00 us  
 TE 300.0 K  
 D1 1.00000000 s  
 TDO 1

===== CHANNEL f1 =====  
 NUC1 1H  
 P1 10.00 us  
 PL0 -6.01 dB  
 SFO1 300.1318534 MHz

F2 - Processing parameters  
 SI 32768  
 SF 300.1300021 MHz  
 MEW 0  
 SSB 0  
 LB 0.30 Hz  
 GB 0  
 PC 1.00

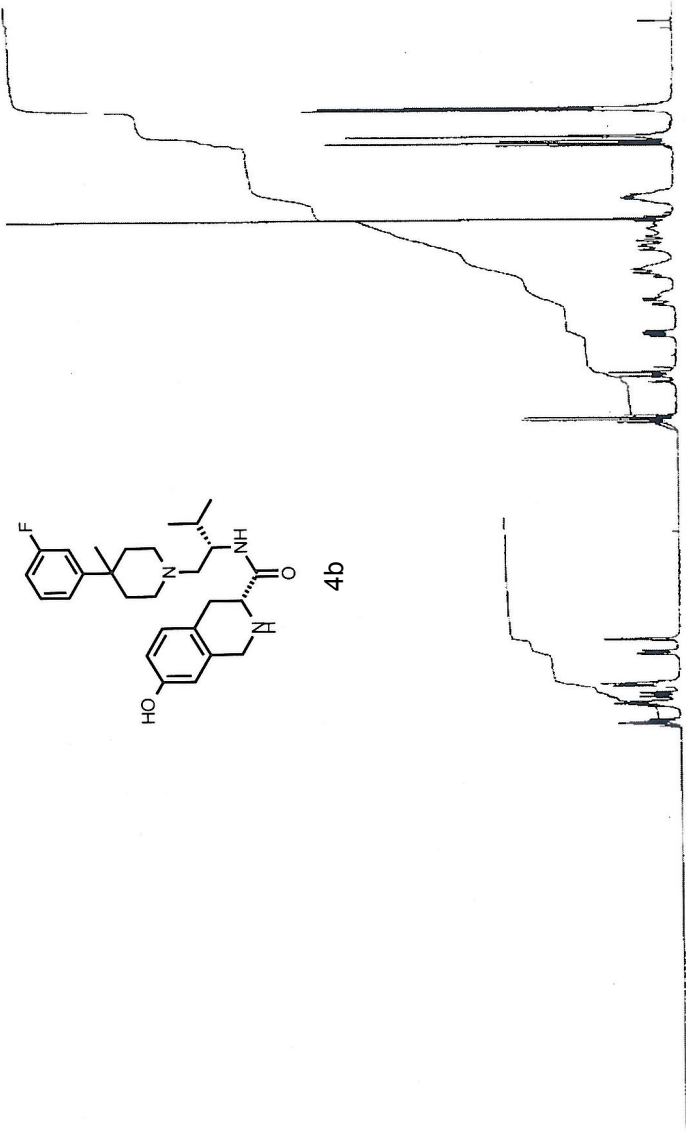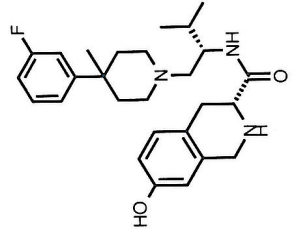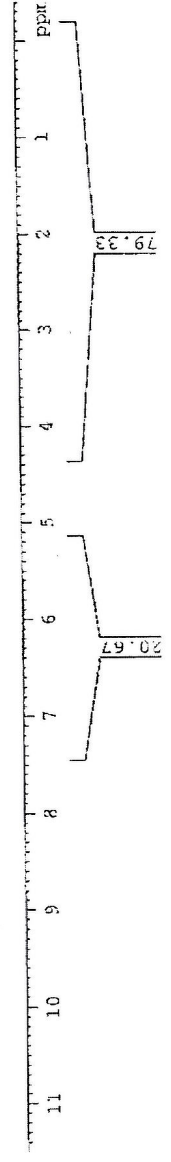

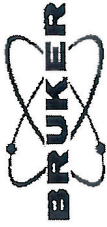

Current Data Parameters  
NAME 12110-073  
EXPNO 10  
PROCNO 1

F2 - Acquisition Parameters  
Date\_ 20131218  
Time 15.49  
INSTRUM spect  
PROBHD 5 mm QNP  
PULPROG zg30  
TD 65536  
SOLVENT CDCl3  
NS 16  
DS 2  
SWH 6172.839 Hz  
FIDRES 0.094190 Hz  
AQ 5.3084660 sec  
RG 328.1  
DW 81.000 usec  
DE 6.00 usec  
TE 300.0 K  
D1 1.00000000 sec  
TD0 1

===== CHANNEL f1 =====  
NUC1 1H  
P1 10.00 usec  
PL1 -6.00 dB  
SFO1 300.1318534 MHz

F2 - Processing parameters  
SI 32768  
SF 300.1300052 MHz  
WDW EM  
SSB 0  
LB 0.30 Hz  
GB 0  
PC 1.00

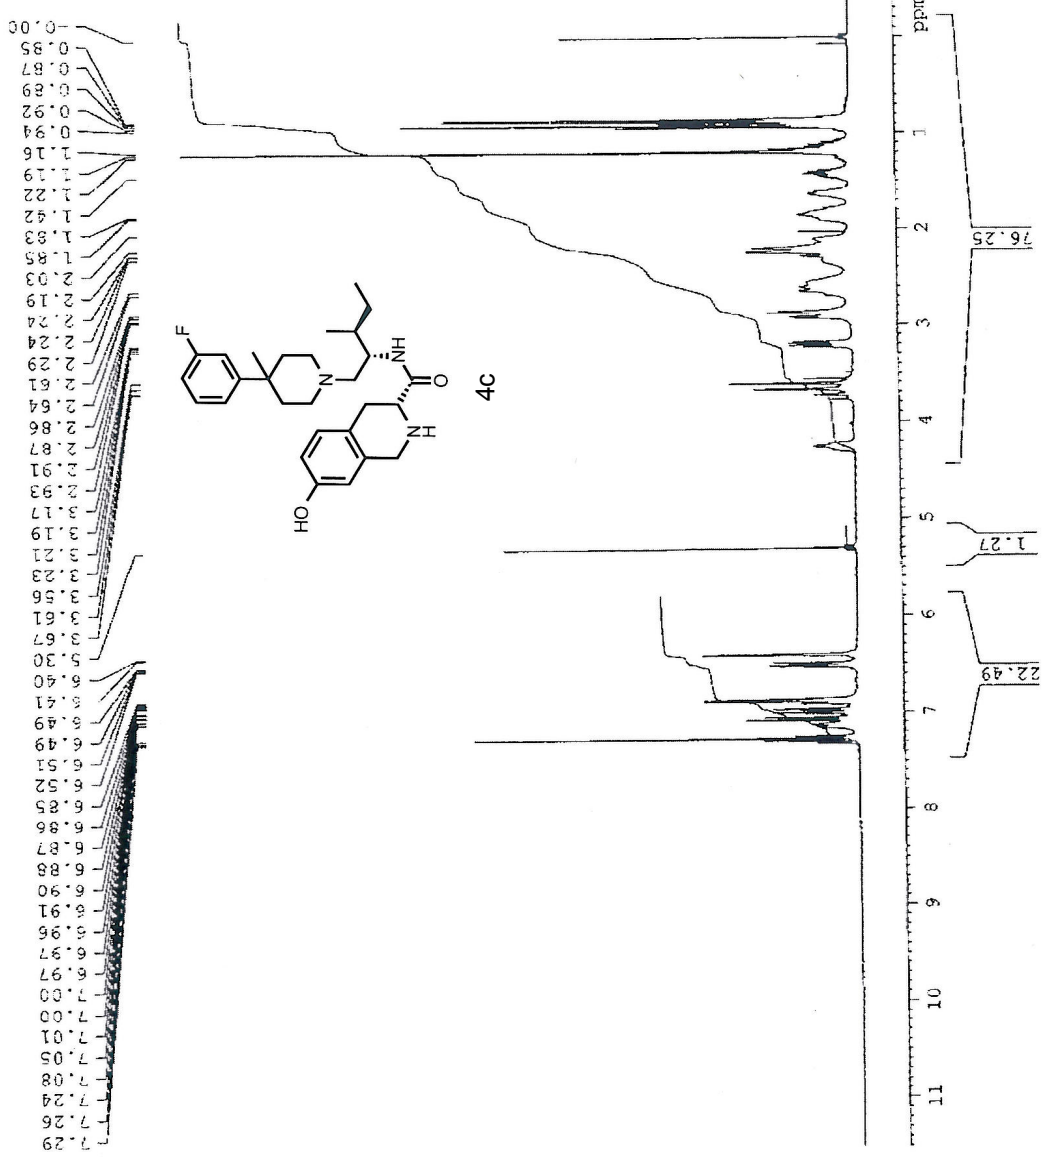

| OriginalDateForRelativeTime 2013-08-22T13:40:16 |                      | Multiplets Integrals Sum 30.98 |                                    | Number of Nuclei 32 H's |                      |
|-------------------------------------------------|----------------------|--------------------------------|------------------------------------|-------------------------|----------------------|
| Acquisition Time (sec)                          | 2.6542               | Comment                        | 5 mm QNP 1H/13C/31P/19F Z3246/0232 | Date                    | 22 Aug 2013 13:40:16 |
| Date Stamp                                      | 22 Aug 2013 13:40:16 | File Name                      |                                    |                         |                      |
| Frequency (MHz)                                 | 300.13               | Nucleus                        | 1H                                 | Number of Transients    | 16                   |
| Original Points Count                           | 16384                | Owner                          | nmrUSER                            | Points Count            | 32768                |
| Receiver Gain                                   | 256.00               | SW(cyclical) (Hz)              | 6172.84                            | Solvent                 | CHLOROFORM-d         |
| Spectrum Offset (Hz)                            | 1844.4757            | Spectrum Type                  | STANDARD                           | Sweep Width (Hz)        | 6172.65              |
|                                                 |                      |                                |                                    | Temperature (degree C)  | 27.000               |

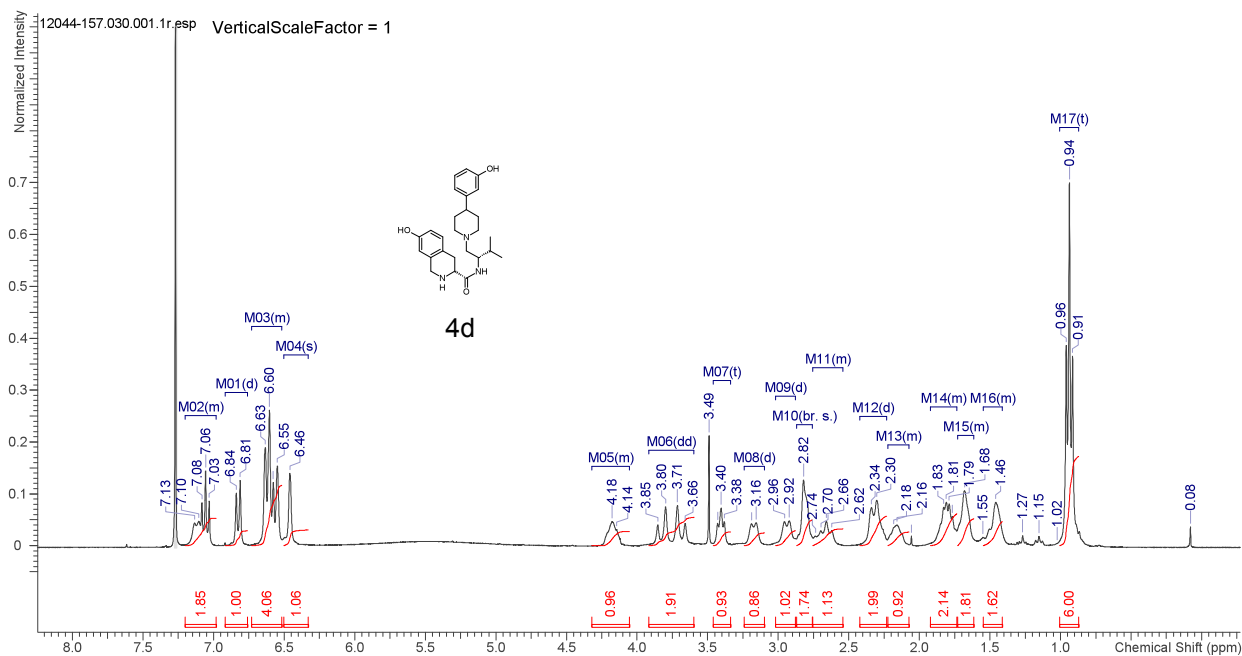

|                                                 |                      |                               |                                   |                        |                      |
|-------------------------------------------------|----------------------|-------------------------------|-----------------------------------|------------------------|----------------------|
| OriginalDateForRelativeTime 2014-01-31T14:37:36 |                      | Multiplets Integrals Sum 0.00 |                                   | Number of Nuclei 0 H's |                      |
| Acquisition Time (sec)                          | 5.3084               | Comment                       | 5 mm QNP 1H/13C/31P/19F Z2346/232 | Date                   | 31 Jan 2014 14:37:36 |
| Date Stamp                                      | 31 Jan 2014 14:37:36 | File Name                     |                                   |                        |                      |
| Frequency (MHz)                                 | 300.13               | Nucleus                       | 1H                                | Number of Transients   | 16                   |
| Original Points Count                           | 32768                | Owner                         | nmruser                           | Points Count           | 32768                |
| Receiver Gain                                   | 512.00               | SW(cyclical) (Hz)             | 6172.84                           | Solvent                | CHLOROFORM-d         |
| Spectrum Offset (Hz)                            | 1850.5039            | Spectrum Type                 | STANDARD                          | Sweep Width (Hz)       | 6172.65              |
|                                                 |                      |                               |                                   | Temperature (degree C) | 27.000               |

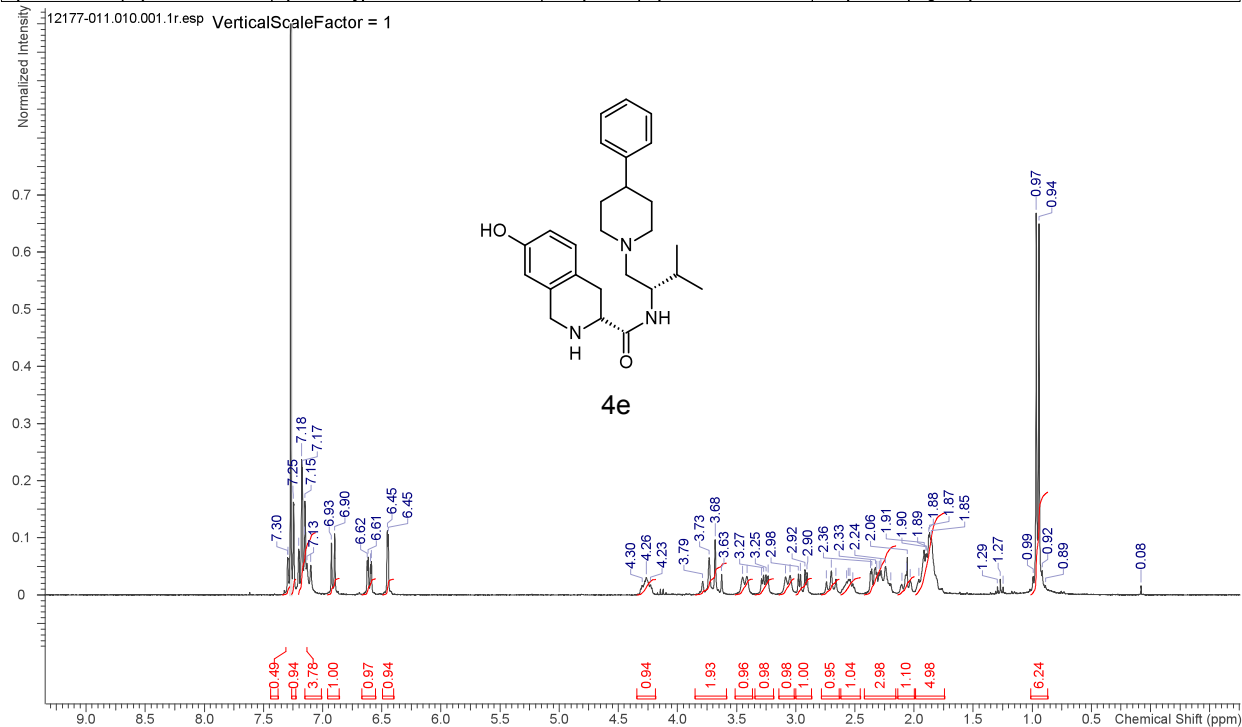

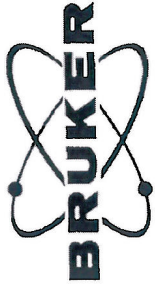

Current Data Parameters  
 NAME 12044-168  
 EXPNO 10  
 PROCNO 1

F2 - Acquisition Parameters  
 Date\_ 20130919  
 Time 17:50  
 INSTRUM spect  
 PROBHD 5 mm QNP 1H/1  
 PULPROG zg  
 TD 32768  
 SOLVENT CDCl3  
 NS 16  
 DS 2  
 SWH 6172.839 Hz  
 FIDRES 0.198380 Hz  
 AQ 2.6542580 sec  
 RG 80.6  
 DW 81.000 usec  
 DE 6.00 usec  
 TE 300.0 K  
 DI 10.00000000 sec  
 TDO 1

==== CHANNEL f1 =====  
 NUC1 1H  
 P1 7.60 usec  
 PL1 -6.00 dB  
 SFO1 300.1318534 MHz

F2 - Processing parameters  
 SI 32768  
 SF 300.1300333 MHz  
 WDW EM  
 SSB 0  
 LB 0.30 Hz  
 GB 0  
 PC 1.00

7.15  
7.13  
7.10  
7.04  
7.01  
6.87  
6.75  
6.51  
6.50  
6.38  
4.15  
3.64  
3.62  
3.13  
3.29  
3.13  
3.21  
3.19  
3.17  
2.99  
2.95  
3.69  
2.88  
2.84  
2.87  
2.63  
2.59  
2.55  
2.44  
2.38  
2.30  
2.15  
1.97  
1.75  
1.35  
1.19  
0.88  
0.86

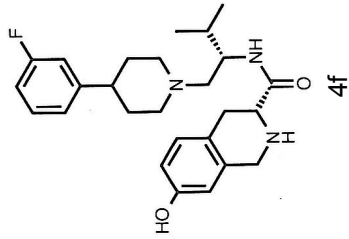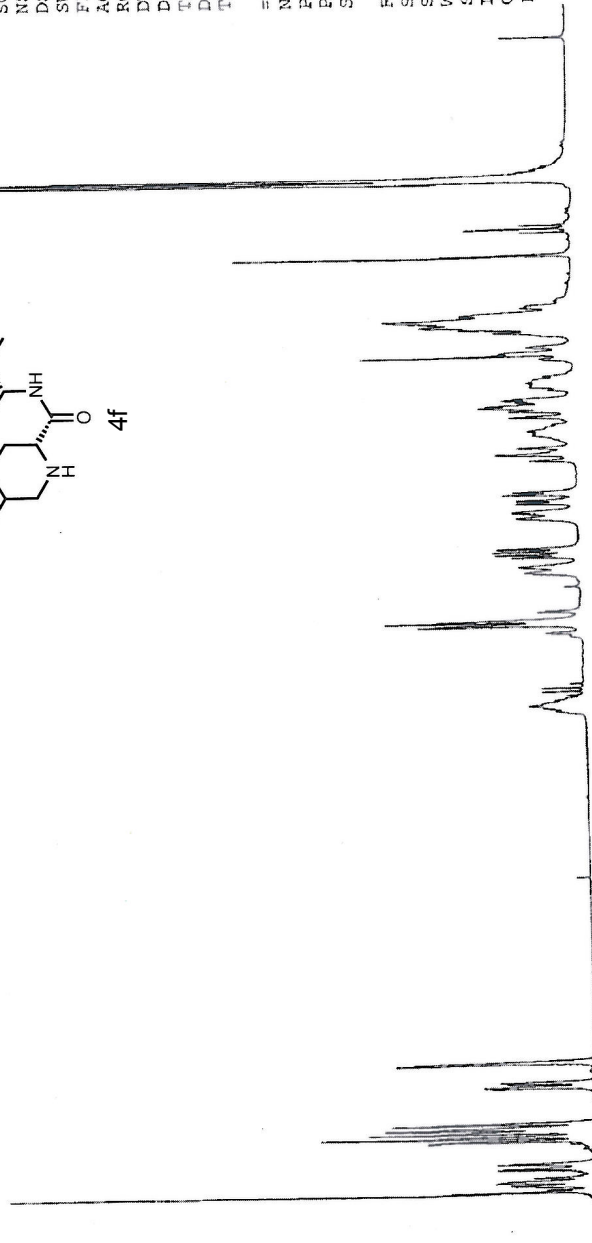

7.15  
7.13  
7.10  
7.04  
7.01  
6.87  
6.75  
6.51  
6.50  
6.38  
4.15  
3.64  
3.62  
3.13  
3.29  
3.13  
3.21  
3.19  
3.17  
2.99  
2.95  
3.69  
2.88  
2.84  
2.87  
2.63  
2.59  
2.55  
2.44  
2.38  
2.30  
2.15  
1.97  
1.75  
1.35  
1.19  
0.88  
0.86  
5.99  
5.21  
1.28  
1.06  
1.96  
1.05  
1.02  
0.99  
1.00  
0.96  
0.90  
1.50  
0.92  
1.24  
1.02  
4.02  
1.00  
0.96
